# Supplementary material for: Chrysin-loaded bovine serum albumin particles as bioactive nanosupplements
Source: Royal Society of Chemistry journal article supplement (doi:10.1039/d0fo00299b), 2020-01-01
Supplement: d0fo00299b1.pdf [file d0fo00299b1.pdf]

## SUPPLEMENTARY MATERIAL

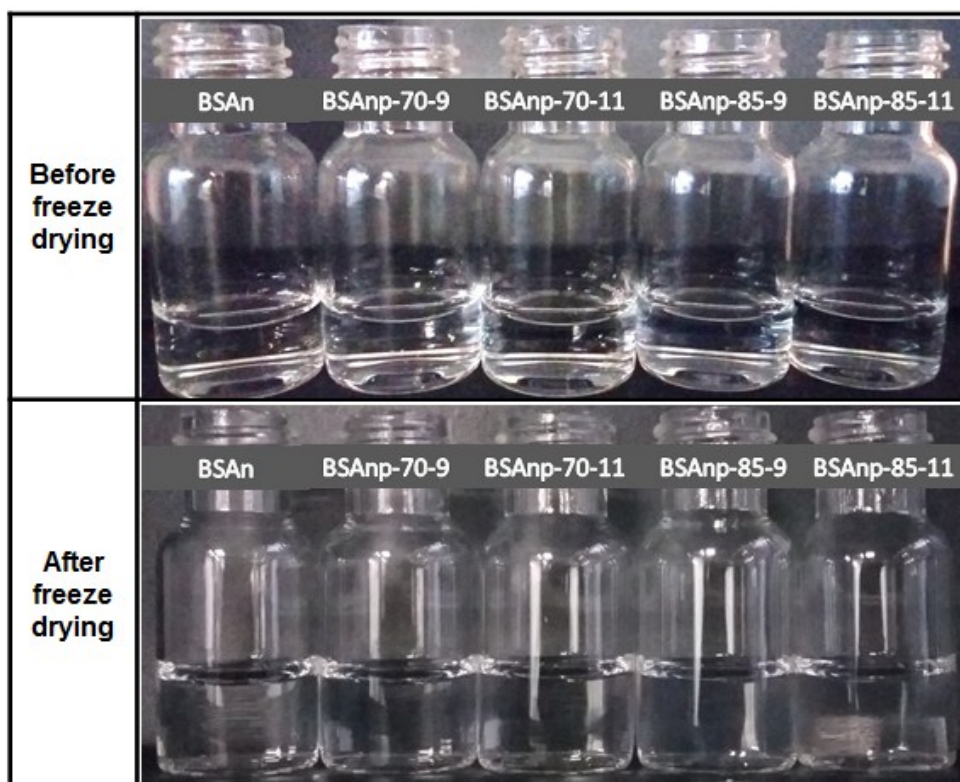

**Fig. 1SM.** Images of solutions of unloaded BSA and BSAp systems before freeze-drying and after freeze-drying and powder reconstitution.

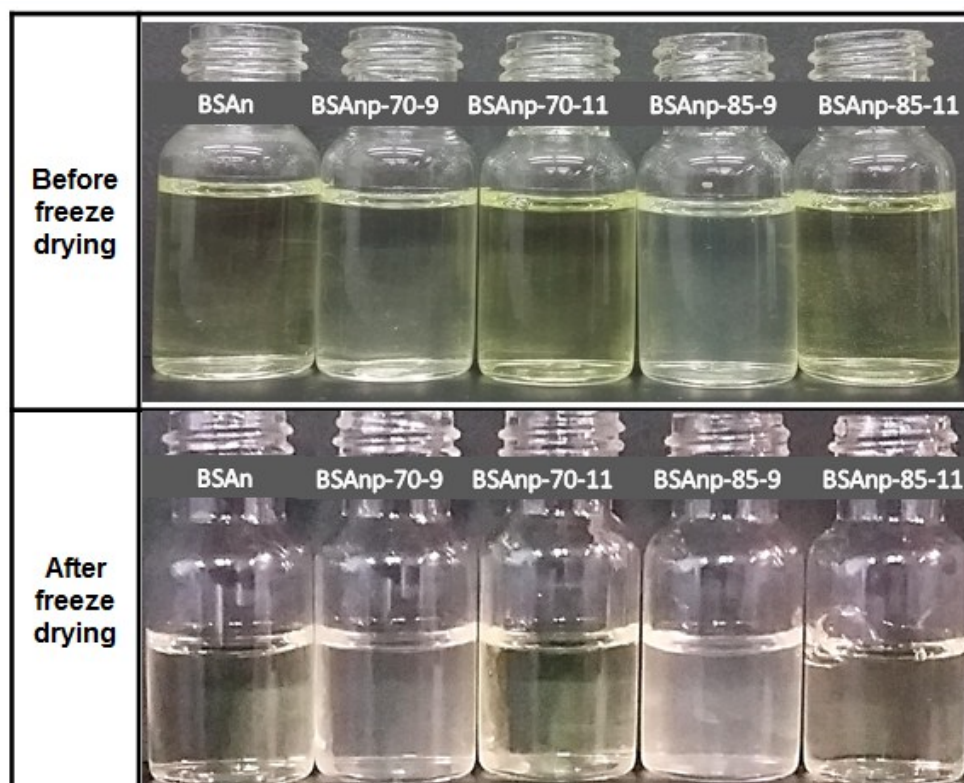

**Fig. 2SM.** Images of solutions of Chrys-loaded BSA and BSAp systems before freeze-drying and after freeze-drying and powder reconstitution.

| Systems           | Diameter (nm) <sup>*</sup> |                           | Polydispersity Index (Pdl)   |                            | ζ Potential (mV)                 |                                  |
|-------------------|----------------------------|---------------------------|------------------------------|----------------------------|----------------------------------|----------------------------------|
|                   | Before freeze-drying       | After freeze-drying       | Before freeze-drying         | After freeze-drying        | Before freeze-drying             | After freeze-drying              |
| BSAn              | 8.4 ± 0.1 <sup>a</sup>     | 9.8 ± 0.3 <sup>a</sup>    | 0.34 ± 0.04 <sup>d,e</sup>   | 0.37 ± 0.05 <sup>e,f</sup> | -9.9 ± 0.3 <sup>h,i,j,k</sup>    | -9.2 ± 0.3 <sup>k</sup>          |
| BSAn-Chrys        | 8.06 ± 0.03 <sup>a</sup>   | 9.4 ± 0.2 <sup>a</sup>    | 0.5 ± 0.1 <sup>g</sup>       | 0.7 ± 0.1 <sup>h</sup>     | -11.3 ± 0.2 <sup>c,d,e</sup>     | -11.2 ± 0.2 <sup>c,d,e,f,g</sup> |
| BSAnp-70-9        | 15.4 ± 0.1 <sup>c,d</sup>  | 21.0 ± 0.1 <sup>g</sup>   | 0.23 ± 0.01 <sup>b,c</sup>   | 0.23 ± 0.05 <sup>b,c</sup> | -9.5 ± 0.6 <sup>j,k</sup>        | -10.3 ± 0.3 <sup>g,h,i,j</sup>   |
| BSAnp-70-9-Chrys  | 16.4 ± 0.4 <sup>e,f</sup>  | 19.6 ± 0.5 <sup>f,g</sup> | 0.27 ± 0.02 <sup>b,c</sup>   | 0.88 ± 0.02 <sup>i</sup>   | -11.2 ± 0.6 <sup>c,d,e,f</sup>   | -11.8 ± 0.4 <sup>c</sup>         |
| BSAnp-70-11       | 13.6 ± 0.2 <sup>b</sup>    | 18.0 ± 0.1 <sup>e,f</sup> | 0.24 ± 0 <sup>b,c</sup>      | 0.41 ± 0.06 <sup>f</sup>   | -9.8 ± 0.1 <sup>ij,k</sup>       | -11.6 ± 0.4 <sup>c,d</sup>       |
| BSAnp-70-11-Chrys | 14.2 ± 0.1 <sup>b,c</sup>  | 20.5 ± 0.9 <sup>g</sup>   | 0.52 ± 0.02 <sup>g</sup>     | 0.53 ± 0.07 <sup>g</sup>   | -13.0 ± 0.3 <sup>b</sup>         | -13.1 ± 0.4 <sup>b</sup>         |
| BSAnp-85-9        | 27.8 ± 0.1 <sup>i</sup>    | 33.8 ± 0.8 <sup>k</sup>   | 0.13 ± 0 <sup>a</sup>        | 0.21 ± 0.01 <sup>b</sup>   | -10.8 ± 0.6 <sup>d,e,f,g,h</sup> | -10.0 ± 0.4 <sup>h,i,j,k</sup>   |
| BSAnp-85-9-Chrys  | 26.3 ± 0.2 <sup>h</sup>    | 31 ± 1 <sup>j</sup>       | 0.30 ± 0.01 <sup>c,d</sup>   | 0.76 ± 0.06 <sup>h</sup>   | -10.9 ± 0.4 <sup>d,e,f,g,h</sup> | -10.7 ± 0.4 <sup>e,f,g,h,i</sup> |
| BSAnp-85-11       | 20.3 ± 0.1 <sup>e</sup>    | 35 ± 3 <sup>k</sup>       | 0.19 ± 0.01 <sup>a,b</sup>   | 0.51 ± 0.06 <sup>g</sup>   | -11.8 ± 0.4 <sup>c</sup>         | -11.8 ± 0.1 <sup>c</sup>         |
| BSAnp-85-11-Chrys | 17.1 ± 0.2 <sup>d,e</sup>  | 28 ± 4 <sup>i</sup>       | 0.34 ± 0.02 <sup>d,e,f</sup> | 0.71 ± 0.04 <sup>h</sup>   | -14 ± 2 <sup>a</sup>             | -10.4 ± 1.2 <sup>f,g,h,i,j</sup> |

**Table 1SM.** Characteristics of BSAn and BSAnp systems before and after freeze-drying measured by DLS (mean ± SD). For each parameter obtained before and after freeze-drying an independent analysis of variance was performed and different letters indicate significant differences ( $p < 0.05$ ).

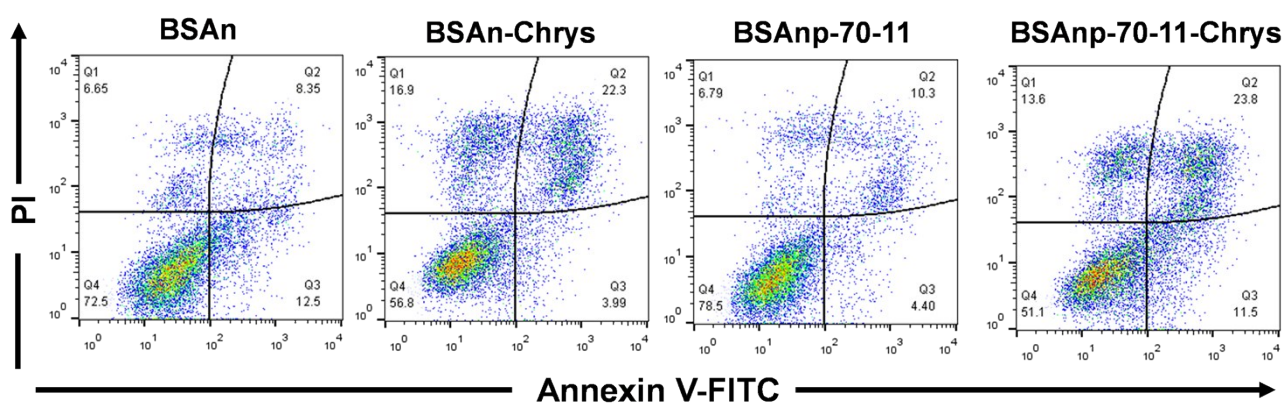

**Fig. 3SM.** Effect of unloaded and Chrys-loaded BSAn and BSAnp-70-11 systems on apoptosis of MCF-7 cells assessed by flow cytometry using Annexin V-FITC/PI staining. The plots are representative of three independent experiments. The numbers in the Q3 and Q2 quadrants indicate the proportions of cells that are Annexin V positive/PI negative and Annexin V positive /PI positive, respectively.
